# Supplementary material for: Adverse Events During Radical Prostatectomy and Their Association With Reccurence and Death
Source: Research Square preprint supplement (doi:10.21203/rs.3.rs-6716233/v1), 2025-06-16
Supplement: Supplementary file 1 [file 8fcb4d60fecf2c24027b6366.docx]

**SUPPLEMENTORY MATERIAL**

| Supplement Table 1. Recurrence defined as one or more of the below listed criteria, with PSA unmeasurable at 6-12 weeks. | | | | | |
| --- | --- | --- | --- | --- | --- |
| Time point | **PSA >0.25ng/ml** | **Radio-/Hormonal -/Chemo-/Other therapy for recurrence** | | | |
| 12 months | yes | yes | yes | yes | yes |
| 24 months | yes | yes | yes | yes | yes |
| 6 years | yes | yes | yes | yes | yes |
| 8 years | yes | yes | yes | yes | yes |

| Supplement Table 2. Association between adverse events during radical prostatectomy and prostate cancer specific mortality within 8 years of surgery, expressed as hazard ratio (HR). | | |
| --- | --- | --- |
|  | **HR  (95% Confidence interval)** | **p-value** |
| adverse event combined group 1-7 | 1.124 (0.522, 2.419) | 0.766 |
| adverse event combined group 2-7 | 0.989 (0.495, 1.976) | 0.974 |
| 1 Operating time | 1.155 (0.533, 2.503) | 0.716 |
| 2 Perioperative bleeding | 1.771 (0.75, 4.182) | 0.193 |
| 3 Cutting anastomotic suture/s | 0.392 (0.095, 1.609) | 0.194 |
| 4 Difficult dissection | 1.149 (0.524, 2.52) | 0.729 |
| 5 Any defined problem | 0.7 (0.362, 1.353) | 0.289 |
| 6 Adhesiolysis | * | * |
| 7 Other | * | * |
| *Cannot be estimated due to limited number of observations | | |

**Peri operative CRF**

Questions and answers

1. Did teaching during the procedure affect the OR time? Yes/No
2. Was lymph node dissection performed Yes/No
3. Difficulties to dissect vesicula seminales from the surroundings Yes/No
4. Difficulties at dissection of the prostate from the rectum Yes/No
5. Difficulties at mobilization of the bladder Yes/No
6. Difficulties when freeing between bladderneck and prostate Yes/No
7. If a lobus tertius exsisted, were there difficulties when freeing this Yes/No
8. Did any of the sutures in the urethra cut Yes/No
9. Did any of the sutures in the bladder neck cut Yes/No
10. Difficulties when suturing the anastomosis Yes/No
11. Amount of bleeding during the procedure X ml
12. Did you encounter problems during the procedure:
13. With ureter/s Yes/No
14. With the anastomosis Yes/No
15. With the bowel Yes/No
16. Due to technique or instruments Yes/No
17. Due to unusual anatomy Yes/No

**Statistical analysis plan**

Statistical Analysis Plan

*LAPPRO – adverse events during surgery and longterm oncological outcome*

VERSION 1.0

Lantz A, Erestam, S, Li Y, Angenete, E, Bjartell A, Hugosson J, Steineck G,, Wiklund P, Haglind, E.

# INTRODUCTION

This Statistical Analysis Plan (SAP) details the statistical and data related aspect of a planned manuscript on adverse events during radical prostatectomy and possible relationships to long term oncological outcome in the LAParoskopisk Prostatectomy Robot Open – LAPPRO study.

The hypothesis is that adverse events during surgery is associated with the risk of biochemical recurrent disease (wide definition of “BCR”), all cause mortality, cancer specific mortality and that the association may be dependent on to surgical technique.

Further, risk factors for adverse events can be identified preoperatively, and may differ between the two surgical techniques.

# ANALYSIS OBJECTIVES

The primary objective is analysing the association between adverse events during surgery and bio-chemical recurrence (BCR) later than 12 months post-operatively, for the entire cohort and for the subgroups robot assisted laparoscopic and open technique respectively including a comparison between the two.

The secondary objectives are to:

- Analyse a possible association between adverse events during surgery and all cause mortality as well as cancer specific mortality (8 year data), for the entire cohort and for subgroups (surgical technique).
- Identify preoperative risk factors for adverse events, for the entire cohort and for the two subgroups separately.

# STUDY METHODS

**Setting:**

This study is a post-hoc analysis of the LAParoscopic Prostatectomy Robot Open – LAPPRO study. The LAPPRO-study was a prospective, controlled, nonrandomised trial of patients undergoing prostatectomy in 14 Swedish centres using Robot-assisted laparoscopic prostatectomy (RALP) or open retropubic radical prostatectomy surgery (RRP) during 2008 – 2012. In LAPPRO 3706 patients were included (Haglind et al., 2015) and were followed through clinical record forms preoperatively, perioperatively, during inpatient hospital care, at 6-12 weeks, 12 and 24 months postoperatively. Patients reported their experience pre-operatively, at 3, 12 and 24 months postoperatively as well as at 6, 8 and 12 years after the radical prostatectomy. Data were retrieved from the Cause of Death register at the Swedish Board of Health and Welfare, including date of death, as well as all causes of death.

**Cohort**

The analysis population consists of all patients included in the LAPPRO study and fulfilling the inclusion but not the exclusion criteria and with post-operative data available.

**Type of analysis**

Since this is a non-randomized study patients will be analysed as treated.

## Outcomes:

- Primary outcome: BCR.

The primary endpoint BCR was defined as an initial undetectable PSA value at 3 months (Q6) after surgery followed by a measurable PSA level >0.25 ng/ml at 12 (Q7, Q9-13) or 24 months (Q7, Q9-13). At 6 years as PSA level >0.25ng/mL at any time after 24 months until 6 years ( Q1, Q3, Q4, Q6, Q8, Q10, Q14, Q17, Q18), and at 8 years PSA >0.25 ng/mL (Q180). Receiving additional therapy for prostate cancer (radio-, chemo- or hormonal therapy) reported at 12 or 24 months (CRF 12 or 24 months Q 9-13) or therapy for prostate cancer (Q185, Q188, Q189) after 6 years follow up or after 8 years of follow up (Q185, Q188).

- Secondary outcome: All-cause mortality
- Secondary outcome: Cancer specific mortality

**Exposure:**

The exposure of adverse events was measured in two ways:

- A combined measure: any of adverse events, dichotomous (Yes / No). A patient has experienced any of the adverse events during surgery (listed in table 1) is considered as have had advance events.
- Each of the adverse event as an independent exposure

*Table 1. Adverse events during surgical procedure*

| **Variabel** | **Format** |
| --- | --- |
| Operating time (min)* | CRF op Q 25-29 |
| Difficulties at dissection of neurovascular bundles | CRF op 60 |
| Perioperative bleeding (ml)** | CRF op Q 75 |
| Use of clips | CRF op Q39 |
| Difficulties at dissection of vesicula seminales | CRF op Q Q40-41 |
| “Skar” any of the sutures/takes in bladderneck | CRF op Q69 |
| ”Skar” any of the sutures/takes in urethra | CRF op Q68 |
| Difficulties at dissection of the prostate | CRF op Q42 |
| Difficulties at dissection of the bladder | CRF op Q43 |
| Difficulties at dissection of bladderneck/prostate | CRF op Q45 |
| Difficulties at dissection of tertius | CRF op Q 46 |
| Any of defined complications | CRF op Q83, 85, 87, 91, 93 |
| Difficulties with the anastomosis | CRF op Q70 |
| **Other procedures performed during surgery** | CRF op Q17-23 |
| Adhesiolysis |  |
| Conversion to open procedure |  |
| Ureterolitectomia, open procedure§ |  |
| Repair of external iliac vein*** |  |
| Repair of rectum*** |  |
| Also performed cystolitectomia§ |  |
| Repair of bladder*** |  |
| Reimplantation of ureter*** |  |
| Biopsy from the appendix§ |  |
| Removal of diverticula of the bladder§ |  |
|  |  |

*Cut off time in the OR as defined in Erestam et al >90 min for RRP and >180 min for RALP

**Cut off bleeding as defined before in Erestam et al: >500 ml for RRP and > 100 mlfor RALP

*** for analyses purposes *** will be grouped into one group “repair of damage to other organs”

§ analytical purposes grouped together into one caller “additional procedures”

## Covariates and subgroups

**Covariates:**

Table 2 Preoperative variables possible risk factors

| **Variable** | **Format** | **Source** |
| --- | --- | --- |
| Age at surgery | 37-59; 60-69; 70-75 | Baseline questionnaire Q2 |
| BMI | Yes / No* | Baseline questionnaire derived from Q8+9 |
| TUR-P in history | Yes/No | Baseline questionnaire Q48 |
| History of abdominal surgery | Yes / No | Baseline questionnaire Q52 |
| cT | T1, T2, T3 | CRF 1 Q6 |
| Preoperative Gleason score | xxx+ yyy= | CRF 1 Q20 |
| Hospital |  | Syns på studienummer! |
| Surgeon experience (derived variable from the heterogeneity and learning curve analyses)  hospital | number | CRF op Q8 |
| Teaching during surgery | Yes/No | CRF op Q30 |
| Prostate weight/volume (derived variable) | 0- <20; 20- <40; 40- <60; 60- <80; 80 - | CRF 6-12 weeks Q1  (volume CRF 1 Q21) |
| lymph node dissection |  | CRF op Q31 |

* Cut off BMI 30kg/m2

**Subgroups**

RALP or RRP as defined by CRF op Q17/2 or RRP Q 17/1 respectively.

# STATISTICAL METHODOLOGY

First, selection methods will apply to select the preoperative risk factors (from table 2) for the adverse event (Y/N), for the subgroup robot assisted laparoscopic and open technique respectively. These selected risk factors will be used as part of adjusted variables in the following analyses.

The association between any of adverse events (Y/N) during surgery and BCR will be investigated with cox regression. The selected risk factors for adverse event and known factors related to BCR (clinical T stage, preoperative PSA, Gleason score on biopsy, length of cancer in preoperative biopsy cores, and prostate weight) will be used for adjustment. This analysis will be performed in the entire group, for the subgroups robot assisted laparoscopic and open technique respectively including a comparison.

The model strategy for investigating the association between each of adverse event and BCR will be performed in two steps. The first step will be the variable selection to select the adverse event. The second step will be cox regression to estimate the effect of the selected adverse event on the risk of BCR. The listed covariates in table 2 will be used for adjustment.

The effect of any of the adverse events (Y/N) on cancer-specific mortality and all-cause mortality will be investigate by cox regression separately.

**Multiplicity**

Due to multiple comparisons, the familywise error rate will be inflated. However, due to the explorative and hypothesis-generating objective of the study, no correction for multiplicity will be performed.

**Sample size**

The LAPPRO study was designed with aim of comparing RALP and RRP with regard to urinary incontinence (Thorsteinsdottir et al., 2011)). In Haglind et al., 2015 the observed incidence of urinary incontinence at 12 months was 20%. In

LAPPRO there are 3705 operated patients (2764 and 942 for RALP and RRP, respectively). The sample size was calculated for this endpoint. No calculations of sample size were made for secondary or tertiary endpoints.

**Handling of missing values**

Missing values among variables used for adjustment will be replaced by multiple imputations. Results will be presented as pool estimates using Rubin´s rule.

**Demography and patient characteristics**

The following variables will describe the patients’ characteristics per type of surgery group:

B.

| **Characteristic** | **RRP** | **RRP adverse events** | **RALP** | **RALP adverse events** |
| --- | --- | --- | --- | --- |
| Age at surgery, yr |  |  |  |  |
| Preoperative BMI, kg/m2 |  |  |  |  |
| Preoperative ASA score |  |  |  |  |
| cT |  |  |  |  |
| Preoperative Gleason score |  |  |  |  |
| Operating time, min |  |  |  |  |
|  |  |  |  |  |
| Neurovascular bundle preservation, no (%) |  |  |  |  |
| Lymph node dissection |  |  |  |  |
| Perioperative bleeding, ml |  |  |  |  |
| Pathology tumor stage |  |  |  |  |
| Surgical margin |  |  |  |  |
| Prostatectomy specimen Gleason score |  |  |  |  |
| Length of hospital stay, d |  |  |  |  |
| Surgeon experience |  |  |  |  |

A. Patients characteristics for group with adverse events and without, respectively

| **Characteristic** | **Adverse events** | **No adverse events** |
| --- | --- | --- |
| Age at surgery, yr |  |  |
| Preoperative BMI, kg/m2 |  |  |
| Preoperative ASA score |  |  |
| cT |  |  |
| Preoperative Gleason score |  |  |
| Operating time, min |  |  |
|  |  |  |
| Neurovascular bundle preservation, no (%) |  |  |
| Lymph node dissection |  |  |
| Perioperative bleeding, ml |  |  |
| Pathology tumor stage |  |  |
| Surgical margin |  |  |
| Prostatectomy specimen Gleason score |  |  |
| Length of hospital stay, d |  |  |
| Surgeon experience |  |  |

# TECHNICAL DETAILS

Software used are:

- SPSS®,
- SAS®,
- R®.

# LIST OF TABLES AND FIGURES PLANNED FOR THE MANUSCRIPT

Figure 1: Flow chart

Table 1: Patient characteristics and demography

Table 2: Association between adverse events during radical prostatectomy and BCR

Table 3: Association between adverse events during radical prostatectomy and all cause mortality as well as prostate cancer specific mortality

Table 4: Risk factors for adverse events during radical prostatectomy using different surgical techniques

# REFERENCES

1. Haglind, E., Carlsson, S., Stranne, J., Wallerstedt, A., Wilderang, U., Thorsteinsdottir, T., . . . committee, L. s. (2015). Urinary Incontinence and Erectile Dysfunction After Robotic Versus Open Radical Prostatectomy: A Prospective, Controlled, Nonrandomised Trial. *Eur Urol, 68*(2), 216-225. doi:10.1016/j.eururo.2015.02.029
2. Rosen, R. C., Riley, A., Wagner, G., Osterloh, I. H., Kirkpatrick, J., & Mishra, A. (1997). The international index of erectile function (IIEF): a multidimensional scale for assessment of erectile dysfunction. *Urology, 49*(6), 822-830.
3. Thorsteinsdottir, T., Stranne, J., Carlsson, S., Anderberg, B., Bjorholt, I., Damber, J. E., . . . Haglind, E. (2011). LAPPRO: a prospective multicentre comparative study of robot-assisted laparoscopic and retropubic radical prostatectomy for prostate cancer. *Scandinavian Journal of Urology and Nephrology, 45*(2), 102-112. doi:10.3109/00365599.2010.532506
4. Erestam S, Bock D, Erichsen Andersson A, Bjartell A, Carlsson S, Thorsteinsdottir T, Stinesen Kollberg K, Steineck G, Stranne J, Tyritzis S, Wallerstedt A, Wiklund P, Angenete E, Haglind E. Associations between suregon’s self-assessed operative satisfaction and perioperative factors or outcome. Surg Endosc. 2020 Jan;34(1):61-68

Amendment 20221215

Based on SAP version 20221013, there were a high number of adverse events, which is unrelavant to further investigate. After discussion, the adverse events changed to defined in seven groups adverse event, as listed in Table A.

|  | Table A |  |  |  |  |
| --- | --- | --- | --- | --- | --- |
|  |  | not adverse (0) | adverse (1) | NA | note |
| **1** | **Operating time** | **2651** | **293** | **500** | Adverse: last 10% operating time in RRP and RALP groups, for RRP >171.2 min, for RALP>264 min |
| **2** | **Perioperative bleeding** | **2993** | **249** | **202** | Adverse: last 10% of bleeding in RRP and RALP groups, for RRP >1300, for RALP>400 |
| **3** | “Skar” any of the sutures/takes in bladderneck | 3 297 | 76 | 71 | C2: 69 Skar någon sutur i blåhalsen? Adverse: 1="Ja" Not: 2="Nej" NA: 3="Ingen info"  9="missing" |
| ”Skar” any of the sutures/takes in urethra | 3239 | 142 | 63 | C2: 68 Skar någon sutur i uretra? Adverse: 1="Ja" Not: 2="Nej" NA: 3="Ingen info"  9="missing" |
| Difficulties with the anastomosis | 3258 | 117 | 69 | C2: 70 Fanns svårigheter när anastomosen syddes? Adverse: 4="Ja, stora svårigheter"  Not: 1="Nej, inga svårigheter"   2="Ja, små svårigheter"  3="Ja, måttliga svårigheter" NA: 9="missing"; |
|  | **Combined group 3** | **3062** | **299** | **83** | Adverse: any items in group 3= 1 NA: any items in group 3 = NA  Not: rest |
| **4** | Difficulties at dissection of the prostate | 3302 | 93 | 49 | C2: 42 Var det svårt att dissekera loss prostata från rektum? Adverse: 5="Ja, stora svårigheter" Not: 1="Inte aktuellt"  2="Nej, inga svårigheter"  3="Ja, små svårigheter"  4="Ja, måttliga svårigheter" NA: 9="missing"; |
| Difficulties at dissection of the bladder | 2602 | 33 | 809 | C2: 43 Fanns svårigheter vid nedlösningen av urinblåsan Adverse: 5="Ja, stora svårigheter" Not: 1="Inte aktuellt"  2="Nej, inga svårigheter"  3="Ja, små svårigheter"  4="Ja, måttliga svårigheter" NA: 9="missing"; |
| Difficulties at dissection of bladderneck/prostate | 3219 | 173 | 52 | C2: 46 Fanns svårigheter att fripreparera mellan blåshalsen och prostatan? Adverse: 5="Ja, stora svårigheter" Not: 1="Inte aktuellt"  2="Nej, inga svårigheter"  3="Ja, små svårigheter"  4="Ja, måttliga svårigheter" NA: 9="missing"; |
| Difficulties at dissection of tertius | 3331 | 52 | 58 | C2: 47 Om det fanns en tertiuslob, var det då svårigheter att fripreparera denna Adverse: 5="Ja, stora svårigheter" Not: 1="Inte aktuellt"  2="Nej, inga svårigheter"  3="Ja, små svårigheter"  4="Ja, måttliga svårigheter" NA: 9="missing"; |
| Difficulties at dissection of neurovascular bundles | 2551 | 162 | 731 | left side:C2: 58 Vid den nervsparande dissektionen, fanns det svårigheter att lösgöra den 1="Inte aktuellt, ingen dissektion" 2="Nej, inga svårigheter" 3="Ja, små svårigheter" 4="Ja, måttliga svårigheter" 5="Ja, stora svårigheter"  9="missing"; right side:C2: 59 Vid den nervsparande dissektionen, fanns det svårigheter att lösgöra den 1="Inte aktuellt, ingen dissektion" 2="Nej, inga svårigheter" 3="Ja, små svårigheter" 4="Ja, måttliga svårigheter" 5="Ja, stora svårigheter"  9="missing"; Adverse: C2:58=5 or C2:59=5 NA: C2:58='missing' or C2:59='missing' NOT: rest |
| Difficulties at dissection of vesicula seminales | 3181 | 162 | 101 | C2: 40 väster sida, fanns svårigheter att lösgöra Vesicula seminalis från omligga1="Nej, inga svårigheter" 2="Ja, små svårigheter" 3="Ja, måttliga svårigheter" 4="Ja, stora svårigheter" 9="missing"; C2: 41 Höger sida, fanns svårigheter att lösgöra Vesicula seminalis från omligga1="Nej, inga svårigheter" 2="Ja, små svårigheter" 3="Ja, måttliga svårigheter" 4="Ja, stora svårigheter" 9="missing"; Adverse: C2:40=4 or C2:41=4 NA: C2:40='missing' or C2:40='missing' NOT: rest |
|  | **Combined group 4** | **1809** | **489** | **1146** | Adverse: any items in group 4= 1 NA: any items in group 4 = NA  Not: rest |
| **5** | **Any of defined complications** | **2703** | **698** | 43 | C2: 83 Förekom det problem vid operationen: med urinledare? C2: 85 Förekom det problem vid operationen: med anastomos? C2: 87 Förekom det problem vid operationen: med tarm? C2: 91 Förekom det problem vid operationen: på grund av ovanlig anatomi? C2: 93 Förekom det problem vid operationen: andra komplikationer? 1="Ja" 2="Nej" 9="missing"; Adverse: C2:83=1 or C2:85=1or C2:87=1 or C2:91=1 or C2:93=1 NA: C2:83='missing' or C2:85='missing' or C2:87='missing' or C2:91='missing' or C2:93='missing'  NOT: rest |
| **6** | **Adhesiolysis** | 3382 | **62** |  |  |
| **7** | Conversion to open procedure | 3441 | 3 |  |  |
| repair ddamage to other organ | 3431 | 13 |  |  |
| additional procedure | 3439 | 5 |  |  |
| **Combined group 7** | **3423** | **21** |  |  |

The exposure of adverse events was measured in two ways:

- A combined measure: any of adverse events, dichotomous (Yes / No). A patient has experienced any of the adverse events during surgery (listed in table A) is considered as have had advance events.
- Each of the adverse event group (1-7) as an independent exposure

**Amendment 20230207:**

- There were extensive missing of adverse event in several hospitals. So there is no possibility to investigate the hospitals effect on the developing of adverse event.
- As the variables of ‘length of cancer in preoperative biopsy cores should be used restrictly due to the commends’some have reported all biopsies during a duration of time, some only last session’, it will not used for the adjustment variables in the check the association between the adverse event and outcomes.

The selected risk factors for advese events do not necessarily influence the outcomes (BCR). Therefore there are not the confounders.

Therefore, only clinical T stage, preoperative PSA, Gleason score on biopsy, and prostate weight will be used as adjustments in the cox regression.

- As the only the variables related Tumour characteristics are adjusted in the model. So the imputation for missing values will not be applied. We will use listwise rule for missing values, i.e. only include those observations do not have missing values.

**Amendment 2024 06 26**

As a result of review comments (BJUI) in June 2024, the following analysis was conducted on June 26, 2024: Total blood loss volume per subgroup and association with recurrence.
